# Supplementary material for: Nanoarchitectonics of ultrafine molybdenum carbide nanocrystals into three-dimensional nitrogen-doped carbon framework for capacitive deionization
Source: Royal Society of Chemistry journal article supplement (doi:10.1039/d4sc00971a), 2024-01-01
Supplement: d4sc00971a1.pdf [file d4sc00971a1.pdf]

## S1. Experimental Section

### S1.1. Chemicals

Methanol ( $\geq 99.5\%$ ), *N,N*-Dimethylformamide (DMF,  $\geq 99.8\%$ ), isopropanol ( $\geq 99.5\%$ ), and *N*-methyl-2-pyrrolidone (NMP, 99.9%) were obtained from Makclm Chemistry (Shanghai, China). Zinc acetate dihydrate ( $\text{Zn}(\text{OAc})_2 \cdot 2\text{H}_2\text{O}$ , 99%), 2-methylimidazole (MeIm, 98%) and sodium molybdate ( $\text{Na}_2\text{MoO}_4$ , 99%) were purchased from Aladdin Chemistry (Shanghai, China). Polyvinylidene fluoride (PVDF 6020), carbon black (Super P), and Nafion solution (5 wt.%) were provided by Sigma-Aldrich (Merck, Shanghai, China). Bulk molybdenum carbide (MoC, 99.95%) for the comparison was obtained from Aladdin Chemistry (Shanghai, China). All chemicals were used as purchased without further processing.

### S1.2. Construction of ZIF-8 RDs

For a typical synthesis of ZIF-8 RDs [S1, S2], 1.0 mmol (219.5 mg) of  $\text{Zn}(\text{OAc})_2 \cdot 2\text{H}_2\text{O}$  was dissolved into 10 mL of ultrapure water to form a homogeneous  $\text{Zn}^{2+}$  solution. 10 mmol (821.1 mg) of MeIm was dissolved into 10 mL of ultrapure water to prepare another solution. The  $\text{Zn}^{2+}$  solution was quickly added into the MeIm solution. After vigorously stirring for 5 min, the mixture solution was kept at room temperature for 24 h to obtain the white precipitates. The white precipitates were separated by centrifugation and thoroughly washed with water and methanol for several times, and dried in vacuum oven at 60 °C overnight to harvest ZIF-8 RDs.

### S1.3. Preparation of MOF/MoO<sub>4-x</sub>

MOF/MoO<sub>4-x</sub> (*x* stands for the mass ratio of  $\text{Na}_2\text{MoO}_4$  to ZIF-8, *x*=0.25, 0.5, and 1) were prepared according to the previous report [S1] with some modifications. Briefly, 200 mg of the ZIF-8 RDs were ultrasonically dissolved into 20 mL of DMF. Following this, 100 mg of  $\text{Na}_2\text{MoO}_4$  with the mass ratio of 0.5 was added into the above ZIF-8 RDs solution to synthesis MOF/MoO<sub>4-0.5</sub>. Under stirring for 20 min, the mixture solution was transferred into a Teflon-lined stainless steel autoclave and kept at 150 °C for 6 h. After cooling down to ambient temperature, the MOF/MoO<sub>4-0.5</sub> was collected by centrifugation and washed by DMF and methanol for several times, and finally dried in vacuum oven.

Another two amounts of  $\text{Na}_2\text{MoO}_4$  (50 and 200 mg) with the mass ratios of 0.25 and 1 were also added into the ZIF-8 RDs solution (200 mg in DMF) for the construction of MOF/ $\text{MoO}_4$ -0.25 and MOF/ $\text{MoO}_4$ -1 by using the similar procedures as described above, respectively.

#### ***S1.4. Synthesis of NC/ $\text{Mo}_y\text{C}$ - $x$***

The above MOF/ $\text{MoO}_4$ - $x$  precursors were placed into a ceramic boat and thermally carbonized under nitrogen gas flow in a tube furnace, yielding NC/ $\text{Mo}_y\text{C}$ - $x$  ( $y$  represents the atomic ratio of Mo to C,  $y=1$  or  $2$ ;  $x$  stands for the mass ratio of  $\text{Na}_2\text{MoO}_4$  to ZIF-8,  $x=0.25, 0.5,$  and  $1$ ). During the carbonization process, the MOF/ $\text{MoO}_4$ - $x$  were firstly heated from room temperature to  $400\text{ }^\circ\text{C}$  with a heating rate of  $2\text{ }^\circ\text{C min}^{-1}$  and keep for 3 h. Subsequently, the temperature was further improved from  $400$  to  $800\text{ }^\circ\text{C}$  with the same heating rate ( $2\text{ }^\circ\text{C min}^{-1}$ ) and also kept for another 3 h. After cooling down to room temperature, the NC/ $\text{Mo}_y\text{C}$ - $x$  products were obtained. Specifically, the MOF/ $\text{MoO}_4$ -0.25 and MOF/ $\text{MoO}_4$ -0.5 precursors were converted into NC/MoC-0.25 and NC/MoC-0.5 with the single-phased MoC nanocrystals, while the MOF/ $\text{MoO}_4$ -1 precursor was transformed to the dual-phased NC/MoC/ $\text{Mo}_2\text{C}$ -1 after the thermal pyrolysis [S1-S3]. For comparison, ZIF-8 RDs were pyrolyzed to yield the carbonaceous materials, denoted as ZIF-8-C.

#### ***S1.5. Characterizations***

The structure and morphology of the MOF/ $\text{MoO}_4$ - $x$  and NC/ $\text{Mo}_y\text{C}$ - $x$  were observed by field emission scanning electron microscopy (SEM, Hitachi SU-8000, Japan) with an accelerating voltage of 10.0 kV. Transmission electron microscopy (TEM), high-resolution TEM (HRTEM) images, and elemental mapping analysis were performed using a JEM-2100F (JEOL, Japan) operated at 200 kV. X-ray photoelectron spectroscopy (XPS) spectra were collected on a PHI Quantera SXM (ULVAC-PHI, Japan) instrument with an Al  $K\alpha$  radiation, and the binding energies were calibrated by referencing them to the C 1s (284.5 eV) binding energy. X-ray diffraction (XRD) patterns were examined by using a Rigaku Rint 2000 X-ray diffractometer (Tokyo, Japan) with monochromatic Cu  $K\alpha$  radiation (40 kV, 40 mA) at a scanning rate of  $2^\circ\text{ min}^{-1}$ . Nitrogen adsorption-desorption isotherms were obtained by using an Autosorb-iQ Automated Gas Sorption System

(Quantachrome, USA) at 77 K. The specific surface area was evaluated by the multipoint Brunauer-Emmett-Teller (BET) method based on the adsorption data. The pore-size distributions were calculated from the adsorption branches of isotherms based on the density functional theory method. Fourier-transformed infrared spectra (FT-IR) were obtained using a Bruker Alpha spectrometer (Ettlingen, Germany) in the range of 500-2000  $\text{cm}^{-1}$ . The concentration of NaCl solution was continuously measured by a REX DDSJ-308F conductivity meter (INESA Scientific Instrument, Shanghai, China).

### ***S1.6. Electrocatalysis measurements***

All electrochemical measurements were carried out in 1 M NaCl aqueous electrolyte at room temperature with a three-electrode system on Chenhua CHI 760E electrochemical workstation (Shanghai, China). The Pt/C electrode and KCl-saturated Ag/AgCl were adopted as counter electrode and reference electrode, respectively. The working electrode slurry was prepared by ultrasonically dispersing 2 mg of as-synthesized samples in a mixed solution consisting of 950  $\mu\text{L}$  of isopropanol and 50  $\mu\text{L}$  of Nafion solution (5.0 *wt.*%).

The specific capacitances ( $C$ ,  $\text{F g}^{-1}$ ) are calculated by the following eqn [1] from the GCD curves [S4, S5]:

$$C = \frac{I \times \Delta t}{m \times V} \quad [1]$$

where  $I$  is the current (A),  $\Delta t$  is the discharge time (s),  $m$  is the mass of sample (g), and  $V$  is the voltage window (V).

The correlation between the measured current ( $i$ ) and the scanning rate ( $v$ ) can be expressed by the following eqn [2] and [3]:

$$i = av^b \quad [2]$$

$$\log i = b \log v + \log a \quad [3]$$

where the modulatory parameters  $a$  and  $b$ , obtained from the fitted curves, can indicate whether the process is diffusion-controlled (when  $b$  approaches 0.5) or capacitive-controlled (when  $b$  is close to 1.0) [S6, S7].

The contribution mechanisms of various charging and discharging processes are calculated by the following eqn [4] [S6, S7]:

$$i(V) = k_1v + k_2v^{1/2} \quad [4]$$

where  $k_1v$  and  $k_2v^{1/2}$  represent the capacitive-controlled contribution and diffusion-controlled contribution, respectively.

### ***S1.7. Desalination performance measurements***

The CDI measurements were carried out in a continuous cycle system including a peristaltic pump, constant current power supply, stirring device, a tank and a CDI unit consisting of a pair of working electrodes ( $2.5 \times 2.5 \text{ cm}^2$ ) and a pair of ion exchange membranes. The CDI electrodes were fabricated by a slurry mixing in NMP solution of the NC/Mo<sub>y</sub>C-x: carbon black: PVDF=8: 1: 1. The slurry was coated on graphite paper ( $2.5 \times 2.5 \text{ cm}^2$ ) and dried overnight at 80 °C in a vacuum. In the CDI experiments, the ion conductivity meter was used to monitor and measure the real-time change of NaCl concentration at the outlet of CDI device under different concentrations (100, 250, 500, 750, and 1000 mg L<sup>-1</sup>) and voltages (0.8, 1.0, 1.2, 1.4, and 1.6 V). The volume of NaCl solution was 32 mL, and the flow rate was 20 mL min<sup>-1</sup>. The salt adsorption capacity (SAC, mg g<sup>-1</sup>) and salt adsorption rate (SAR, mg g<sup>-1</sup> min<sup>-1</sup>) at  $t$  min are calculated as following eqn [5] and [6]:

$$\text{SAC} = \frac{(C_0 - C_t) \times V_s}{m} \quad [5]$$

$$\text{SAR} = \frac{\text{SAC}}{t} \quad [6]$$

where  $C_0$  and  $C_t$  are the NaCl concentrations at initial stage and  $t$  min (mg L<sup>-1</sup>), respectively;  $V_s$  is the solution volume (L); and  $m$  is the total mass (16 mg) of the electrode materials on the working electrodes [S8, S9].

The charge efficiency ( $A$ ) is calculated according to eqn [7] [S10, S11]:

$$A = \frac{\Gamma \times F}{\Sigma} \quad [7]$$

where  $\Gamma$  represents the desalination capacity (mol g<sup>-1</sup>),  $F$  denotes the Faraday constant (96485 C mol<sup>-1</sup>), and  $\Sigma$  stands for the integral of the current-time curve (C g<sup>-1</sup>).

The energy consumption ( $E$ , Wh  $g^{-1}$ ) is obtained according to eqn [8] [S10, S11]:

$$E = \frac{v \times \int idt}{3.6 \times (C_0 - C) V} \quad [8]$$

where the  $v$  indicated a driven potential,  $\int idt$  corresponded to the integrated value of the current transient vs. running time plot, and  $V$  (mL) was the rotational solution volume.  $C_0$  and  $C$  ( $mg L^{-1}$ ) were initial and final concentrations, respectively.

The Langmuir isotherm model (eqn [9]) is adopted to simulate the experimental SAC data of ion adsorption on the electrode [S12, S13]:

$$q = \frac{q_m K_L C}{1 + K_L C} \quad [9]$$

where  $q$  is the SAC ( $mg g^{-1}$ ),  $K_L$  is the Langmuir constant related to the heat of adsorption,  $q_m$  is the maximum SAC ( $mg g^{-1}$ ) corresponding to complete monolayer coverage, and  $C$  is the equilibrium concentration ( $mg L^{-1}$ ).

## S2. DFT Calculation Methods

The Cambridge sequential total energy package (CASTEP) module in DFT-based Material Studio was utilized to perform all calculations [S14, S15]. Perdew-Burke-Ernzerhof (PBE) within the generalized gradient approximation (GGA) is employed to calculate the exchange-correlation potential. The cutoff energy is set to be 400 eV. All structures were optimized until the energy converged to  $1.0 \times 10^{-5}$  eV and the force reached 0.02 eV  $\text{\AA}^{-1}$ .

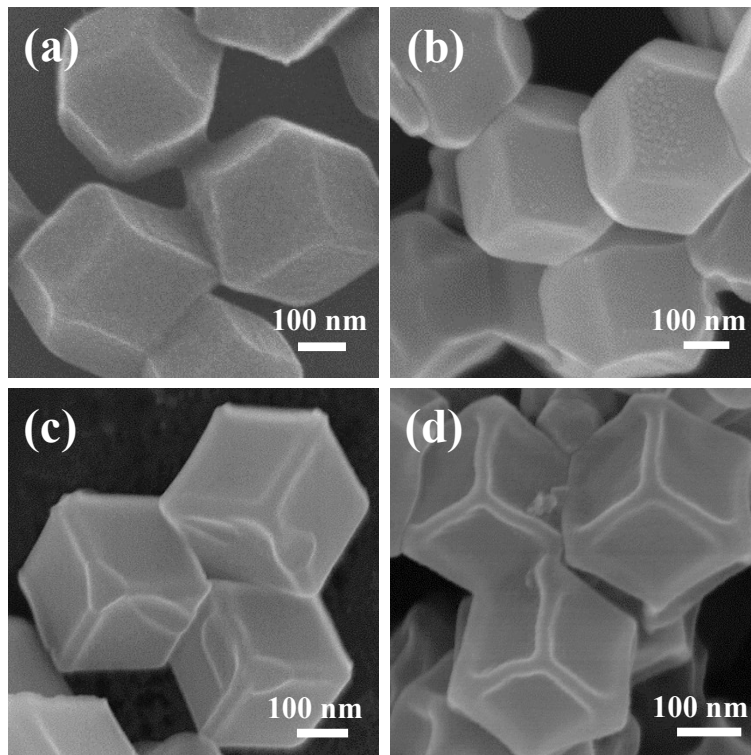

**Fig. S1.** SEM images of (a) MOF/MoO<sub>4</sub>-0.25, (b) MOF/MoO<sub>4</sub>-1, and their-derived (c) NC/MoC-0.25, and (d) NC/MoC/Mo<sub>2</sub>C-1.

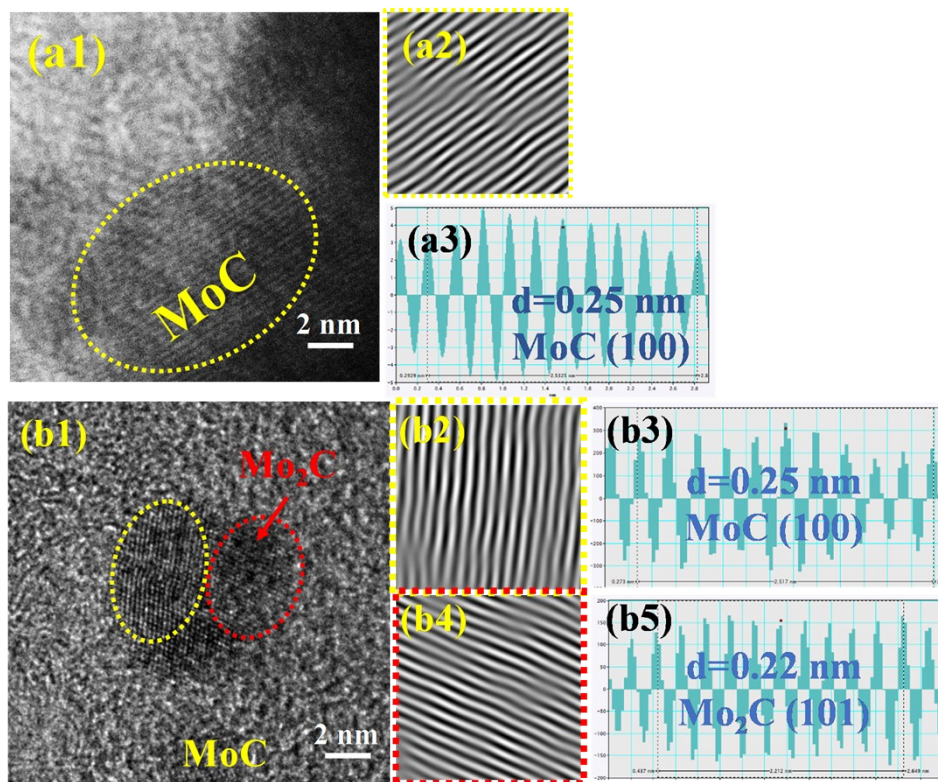

**Fig. S2.** (a1) HRTEM, (a2) inverse fast Fourier transformation (IFFT) image, and (a3) corresponding line scan of NC/MoC-0.25. (b1) HRTEM, and (b2-b4) IFFT images and corresponding line scans of NC/MoC/Mo<sub>2</sub>C-1, including (b2, b4) IFFT images and (b3, b5) corresponding line scans.

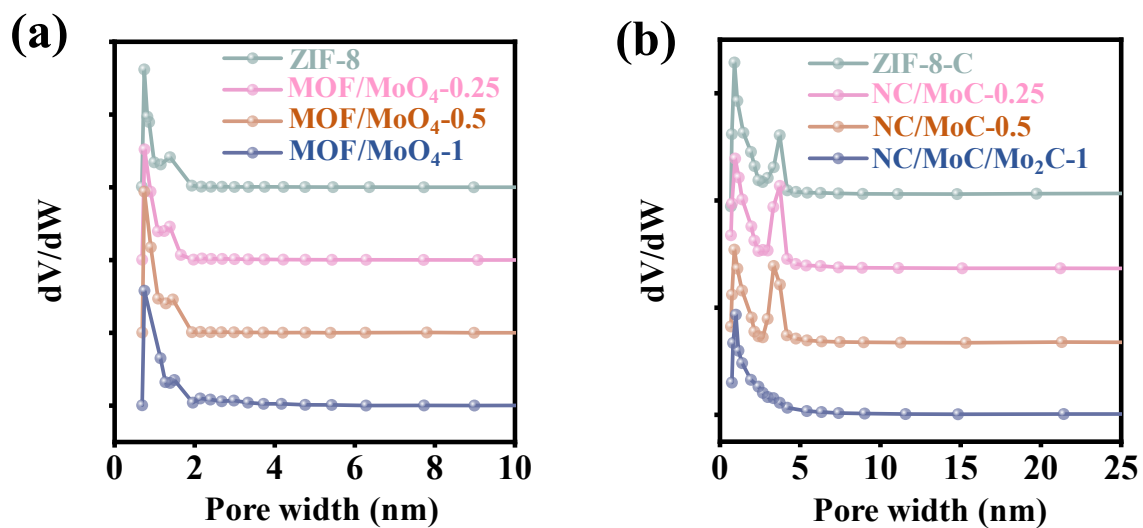

**Fig. S3.** Pore size distributions of (a) ZIF-8 RDs and MOF/MoO<sub>4-x</sub> ( $x=0.25, 0.5, \text{ and } 1$ ) and (b) their derived ZIF-8-C, NC/MoC-0.25, NC/MoC-0.5, and NC/MoC/Mo<sub>2</sub>C-1.



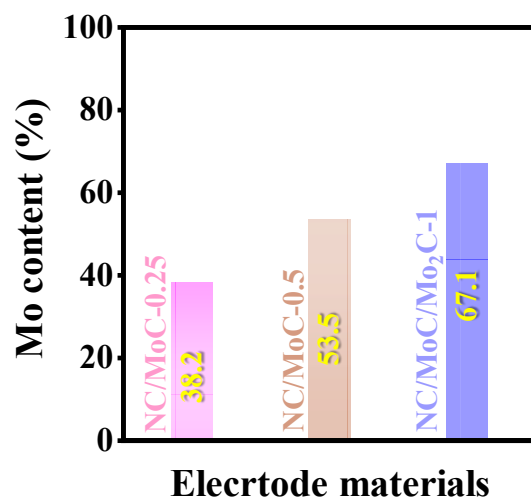

**Fig. S4.** The Mo contents in NC/MoC-0.25, NC/MoC-0.5, and NC/MoC/Mo<sub>2</sub>C-1.

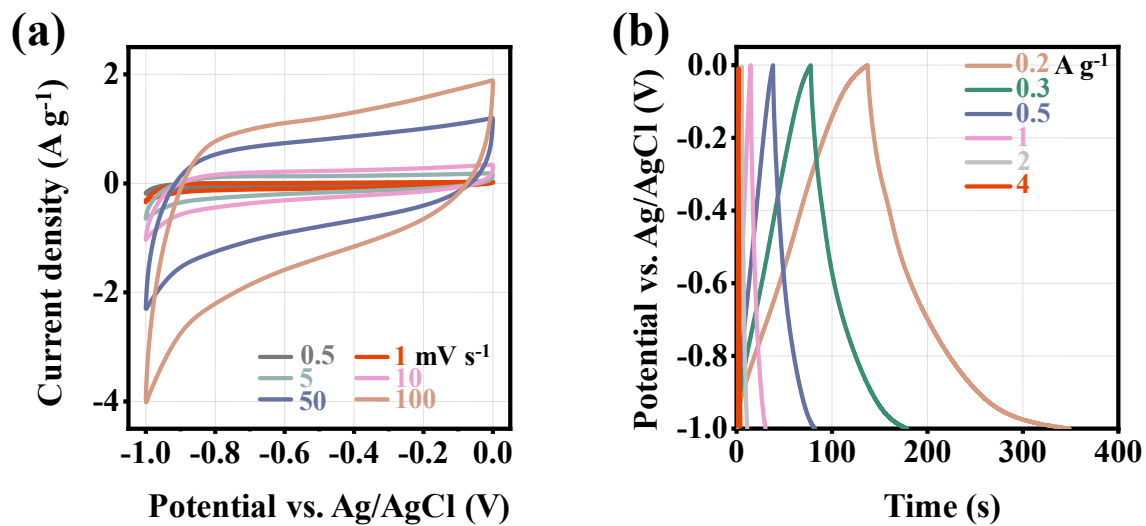

Fig. S5. (a) CV and (b) GCD curves for ZIF-8-C.

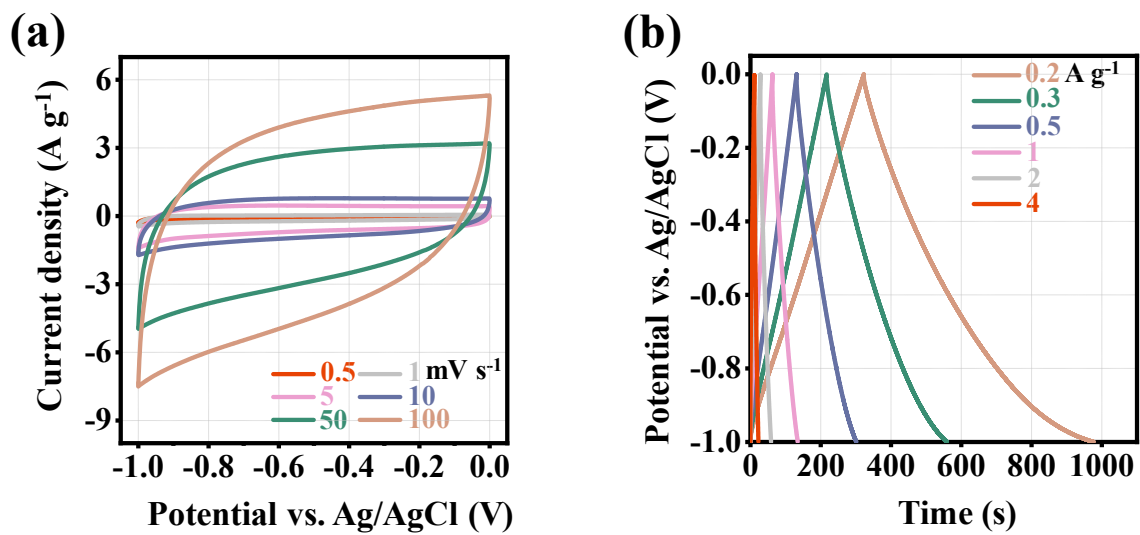

**Fig. S6.** (a) CV and (b) GCD curves of NC/MoC-0.25.

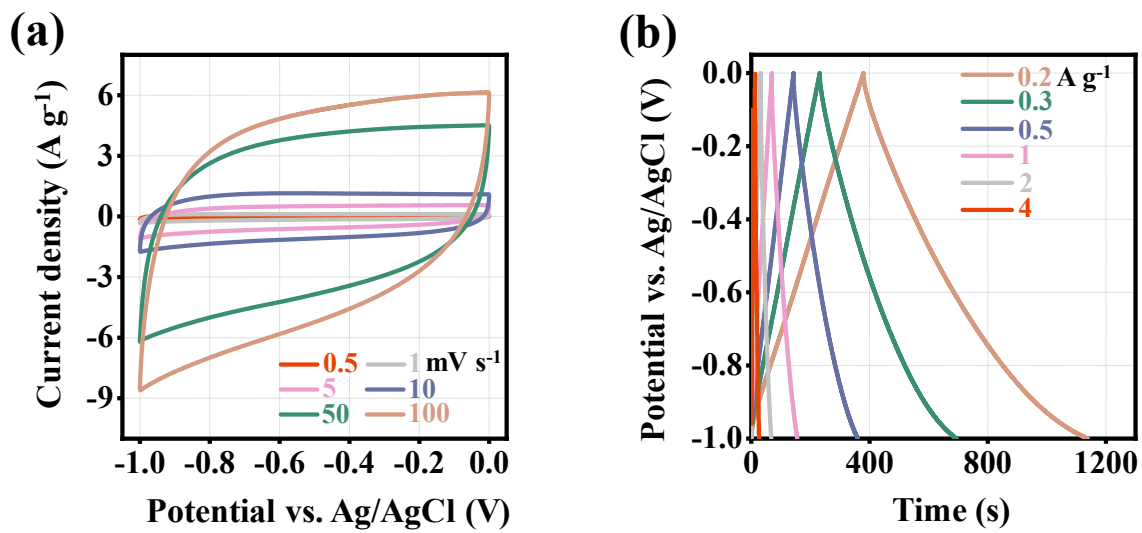

Fig. S7. (a) CV and (b) GCD curves of NC/MoC/Mo<sub>2</sub>C-1.

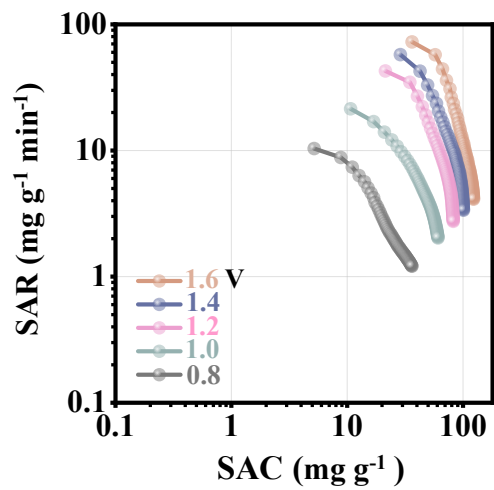

**Fig. S8.** CDI Ragone plots of NC/MoC-0.5 with an initial NaCl concentration of  $500 \text{ mg L}^{-1}$  at various voltages from 0.8 to 1.6 V.

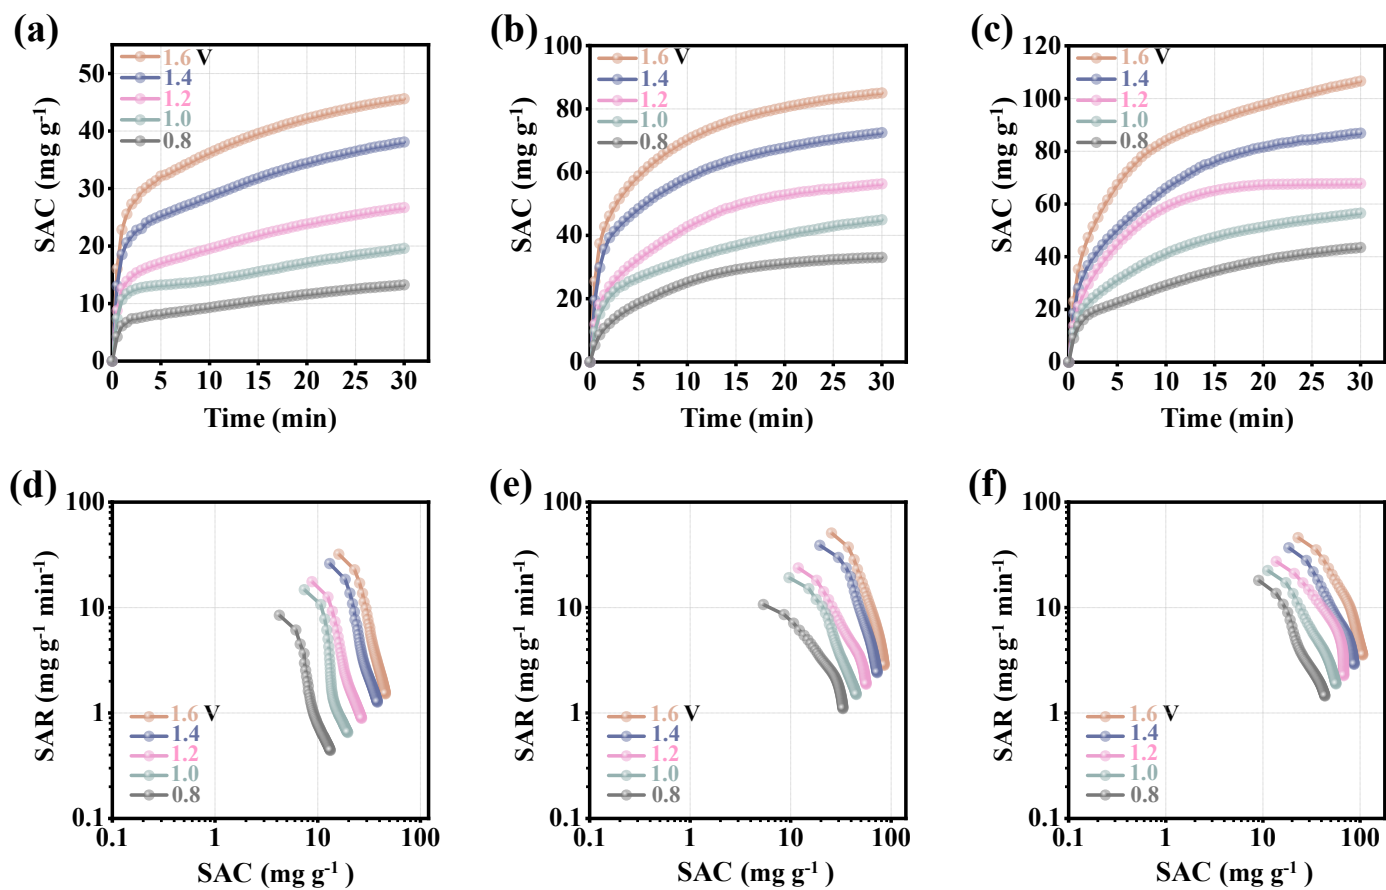

**Fig. S9.** SAC versus deionization time plots of the (a) ZIF-8-C, (b) NC/MoC-0.25, and (c) NC/MoC/Mo<sub>2</sub>C-1 electrodes with initial concentration of 500 mg L<sup>-1</sup> using different voltages. The corresponding CDI Ragone plots for (d) ZIF-8-C, (e) NC/MoC-0.25, and (f) NC/MoC/Mo<sub>2</sub>C-1.

**Table S1.** Comparisons of the transition metal carbides/dichalcogenides or MOFs-derived carbons for their CDI performance.

| Samples <sup>a</sup>                              | SSAs (m <sup>2</sup> g <sup>-1</sup> ) | NaCl concentrations (mg L <sup>-1</sup> ) | Voltages (V) | SACs (mg g <sup>-1</sup> ) | Refs.      |
|---------------------------------------------------|----------------------------------------|-------------------------------------------|--------------|----------------------------|------------|
| MoC@CNFAs                                         | 351.4                                  | 3000                                      | 1.2          | 37.03                      | [S16]      |
| WC@GNFs                                           | 379                                    | 150 (300 μS m <sup>-1</sup> )             | 1.4          | 22.155                     | [S17]      |
| CoCr <sub>7</sub> C <sub>3</sub> @CNFs            | -                                      | 500 (1000 μS m <sup>-1</sup> )            | 1.0          | 20.4                       | [S18]      |
| T-MoS <sub>2</sub>                                | 42.8                                   | 100                                       | 0.8          | 35.0                       | [S19]      |
| MoS <sub>2</sub> -S180                            | -                                      | 500                                       | 0.8          | 28.85                      | [S20]      |
| MoS <sub>2</sub> /CNT                             | 225                                    | 300                                       | 0.8          | 10                         | [S21]      |
| MoS <sub>2</sub> /PDA                             | -                                      | 200                                       | 1.2          | 16.94                      | [S22]      |
| MoS <sub>2</sub> -rGO                             | 28.7                                   | 200                                       | 1.0          | 16.82                      | [S23]      |
| MoS <sub>2</sub> /g-C <sub>3</sub> N <sub>4</sub> | 174.3                                  | 250                                       | 1.6          | 24.16                      | [S24]      |
| MoS <sub>2</sub> /NOMC                            | 233.4                                  | 250                                       | 1.6          | 28.82                      | [S25]      |
| Ce-MoS <sub>2</sub>                               | 3.71                                   | 400                                       | 1.2          | 8.81                       | [S26]      |
| NC@GC/CNTs                                        | 516.46                                 | 1000                                      | 1.6          | 56.30                      | [S27]      |
| NPC/rGO                                           | 1336                                   | 1000                                      | 1.2          | 39.34                      | [S28]      |
| CNF <sub>ZIF</sub>                                | 416                                    | 500                                       | 1.2          | 50.88                      | [S29]      |
| NHPC                                              | 848                                    | 500                                       | 1.4          | 20.05                      | [S30]      |
| NC-800                                            | 798                                    | 50                                        | 1.2          | 8.52                       | [S31]      |
| NP-EHPC                                           | 1165.8                                 | 500                                       | 1.2          | 24.14                      | [S32]      |
| P-CNFA                                            | 728.2                                  | 1000                                      | 1.2          | 16.20                      | [S33]      |
| NC/MoC-0.5                                        | 506.3                                  | 500                                       | 1.2          | 84.2                       | This study |
|                                                   |                                        | 1000                                      | 1.6          | 123.4                      |            |

<sup>a</sup> **MoC@CNFAs**: Molybdenum carbide nanoparticle-embedded carbon nanofiber aerogels; **WC@GNFs**: Tungsten carbide@graphene nanoflakes; **CoCr<sub>7</sub>C<sub>3</sub>@CNFs**: CoCr<sub>7</sub>C<sub>3</sub> metallicmetallic carbides@carbon nanofibers; **T-MoS<sub>2</sub>**: Defect-rich MoS<sub>2</sub>; **MoS<sub>2</sub>-S180**: Oxygen-incorporated MoS<sub>2</sub> that synthesized at 180 °C; **MoS<sub>2</sub>-CNT**: Molybdenum disulfide /carbon nanotube; **MoS<sub>2</sub>/PDA**: MoS<sub>2</sub>/polydopamine; **MoS<sub>2</sub>-rGO**: 3D flower-like MoS<sub>2</sub>/reduced graphene oxide composite; **MoS<sub>2</sub>/g-C<sub>3</sub>N<sub>4</sub>**: MoS<sub>2</sub>/graphitic carbon nitride composite; **MoS<sub>2</sub>/NOMC**: MoS<sub>2</sub>/nitrogen-doped highly ordered mesoporous carbon; **Ce-MoS<sub>2</sub>**: Chemically exfoliated multi-layer MoS<sub>2</sub> nanosheets; **NC@GC/CNTs**: Nitrogen-doped carbon@graphitic carbon/carbon nanotubes; **NPC/rGO**: Porous N, P-doped carbon/reduced graphene oxide; **CNF<sub>ZIF</sub>**: Carbon nanofiber@ZIF-8 derived N-rich porous carbon nanosheets; **NHPC**: Hierarchical porous ZIF-8 derived carbon; **NC-800**: ZIF-8 derived N-doped carbon by the pyrolysis at 800 °C; **NP-EHPC**: N, P co-doped eave-like hierarchical porous carbon; **P-CNFA**: P-doped carbon nanofiber aerogels.

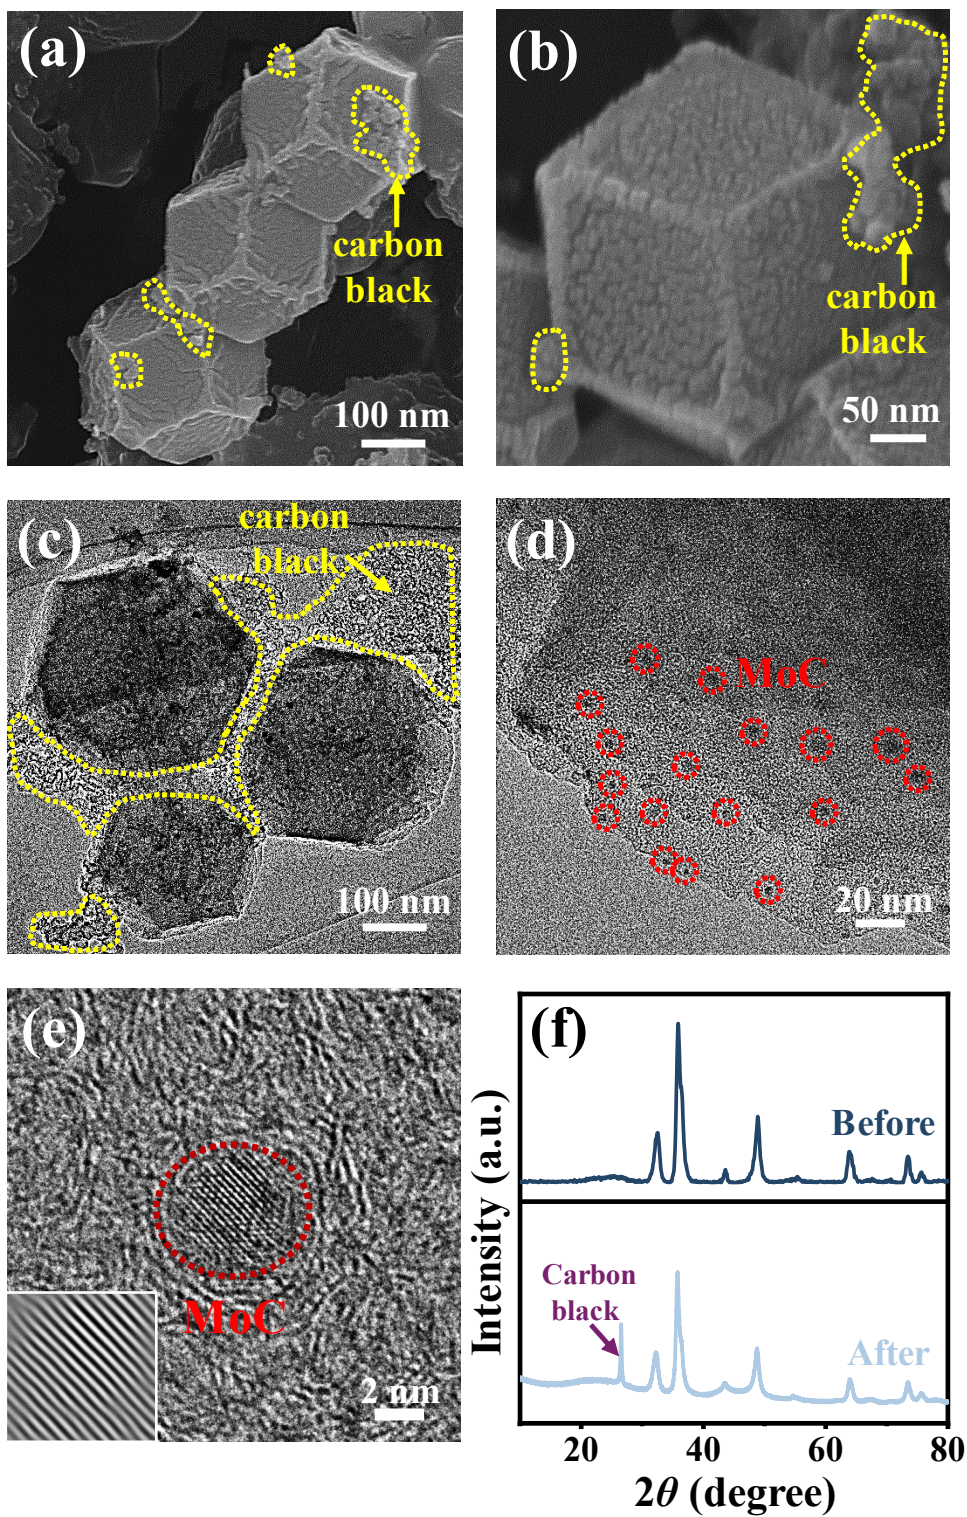

**Fig. S10.** (a, b) SEM, (c, d) TEM, (e) HRTEM (Insert: the IFFT image), and (f) XRD pattern of NC/MoC-0.5 after the 200 CDI cycles (Applied voltage: 1.2 V; NaCl concentration: 500 mg L<sup>-1</sup>).



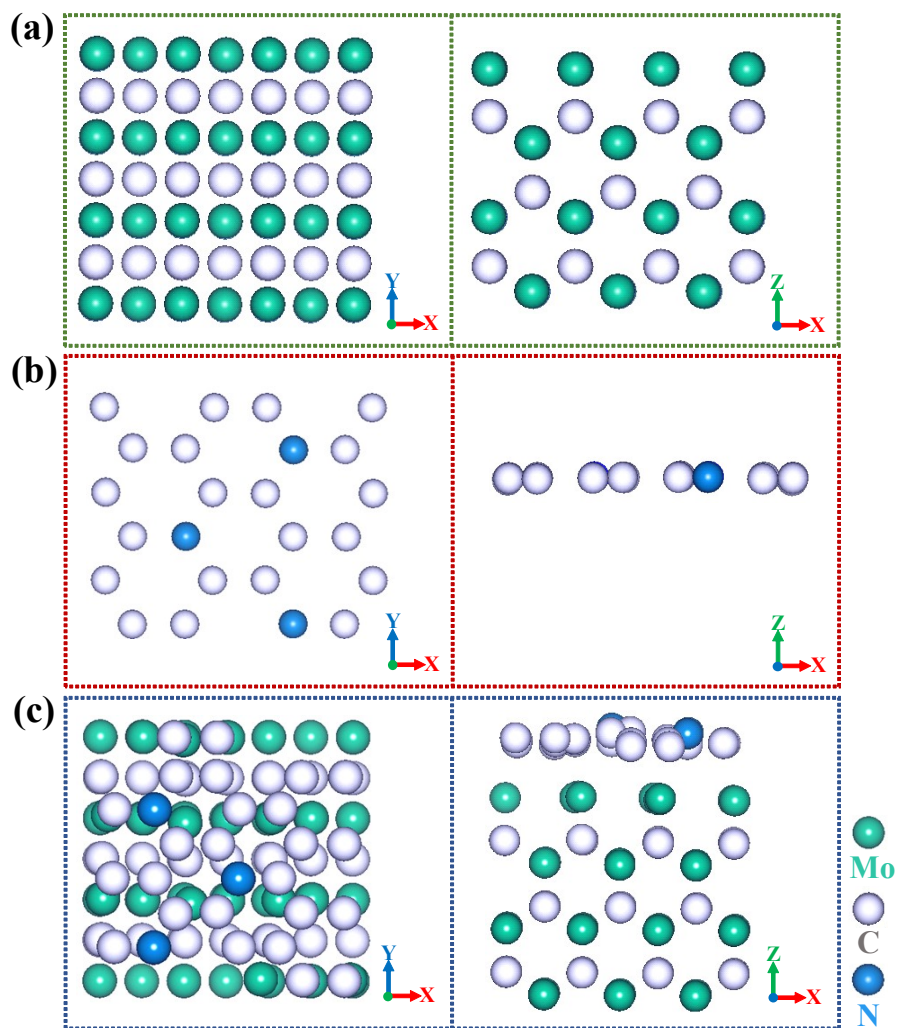

**Fig. S11.** The structure models of (a) MoC, (b) NC, and (c) NC/MoC [S34, S35].

## References

- [S1] X. F. Lu, L. Yu, J. Zhang, X.-W. Lou, *Adv. Mater.*, 2019, **31**, 1900699.
- [S2] C. Avci, J. Ariñez-Soriano, A. Carné-Sánchez, V. Guillerm, C. Carbonell, I. Imaz, D. MasPOCH, *Angew. Chem. Int. Ed.*, 2015, **54**, 14417.
- [S3] Z. Yang, T. Zhao, X. Huang, X. Chu, T. Tang, Y. Ju, Q. Wang, Y. Hou, S. Gao, *Chem. Sci.*, 2017, **8**, 473-481.
- [S4] Y. Li, N. Chen, Z. Li, H. Shao, X. Sun, F. Liu, X. Liu, Q. Guo, L. Qu, *Adv. Mater.*, 2021, **33**, 2105853.
- [S5] T. Yang, H. Zhang, L. Guo, J. Wang, Z. Guo, Y. Du, J. Liu, Y. Zhao, P. Zhang, Z.-Y. Ji, *Desalination* 2023, **567**, 116984.
- [S6] Y. Zhang, H. Li, Q. Yang, S. Zhang, B. Zhao, J. Wu, N. Shang, X. Zhao, Z. Xiao, X. Zang, J. Kim, X. Xu, Y. Yamauchi, *J. Mater. Chem. A* 2023, **11**, 14356.
- [S7] S. Wang, Z. Li, G. Wang, Y. Wang, Z. Ling, C. Li, *ACS Nano* 2021, **16**, 1239-1249.
- [S8] J. Zhao, B. Wu, X. Huang, Y. Sun, Z. Zhao, M. Ye, X. Wen, *Adv. Sci.*, 2022, **9**, 2201678.
- [S9] X. Xu, S. Zhang, J. Tang, L. Pan, M. Eguchi, J. Na, Y. Yamauchi, *EnergyChem* 2020, **2**, 100043.
- [S10] S. Cao, Y. Li, Y. Tang, Y. Sun, W. Li, X. Guo, F. Yang, G. Zhang, H. Zhou, Z. Liu, Q. Li, M. Shakouri, H. Pang, *Adv. Mater.*, 2023, **35**, 2301011.
- [S11] S. Gong, H. Liu, F. Zhao, Y. Zhang, H. Xu, M. Li, J. Qi, H. Wang, C. Li, W. Peng, X. Fan, J. Liu, *ACS Nano* 2023, **17**, 4843-4853.
- [S12] J. Wu, X. Xuan, S. Zhang, Z. Li, H. Li, B. Zhao, H. Ye, Z. Xiao, X. Zhao, X. Xu, X. Liu, J. You, Y. Yamauchi, *Chem. Eng. J.*, 2023, **473**, 145421.
- [S13] W. Kong, X. Ge, Q. Zhang, F. Zhang, D. Kong, X. Zhu, *Carbon* 2023, **215**, 118501.
- [S14] H. Arif, M. B. Tahir, B. S. Almutairi, I. Khalid, M. Sagir, H. Elhosiny Ali, H. Alrobei, M. Alzaid, *Inorg. Chem. Commun.*, 2023, **150**, 110474.
- [S15] M. D. Segall, J. D. L. Philip, M. J. Probert, C. J. Pickard, P. J. Hasnip, S. J. Clark, M. C. Payne, *J. Phys.: Condens. Matter.*, 2002, **14**, 2717.
- [S16] Y. Liu, Y. Zhang, Y. Zhang, Q. Zhang, X. Gao, X. Dou, H. Zhu, X. Yuan, L. Pan, *J. Mater. Chem. A* 2020, **8**, 1443-1450.
- [S17] A.M. Al-Enizi, R.M.A. Hameed, M.M. El-Halwany, M. Bakrey, S.F. Shaikh, A. Yousef, *J. Colloid Interf. Sci.*, 2021, **581**, 112-125.
- [S18] N. Zouli, R.M.A. Hameed, A. Abutaleb, M.M. El-Halwany, M.H. El-Newehy, A. Yousef, *J. Mater. Res. Technol.*, 2021, **15**, 3795-3806.
- [S19] F. Jia, K. Sun, B. Yang, X. Zhang, Q. Wang, S. Song, *Desalination* 2018, **446**, 21-30.
- [S20] K. Sun, X. Yao, B. Yang, F. Jia, S. Song, *Desalination* 2020, **496**, 114758.
- [S21] P. Srimuk, J. Lee, S. Fleischmann, S. Choudhury, N. Jäckel, M. Zeiger, C. Kim, M. Aslan, V. Presser, *J. Mater. Chem. A* 2017, **5**, 15640-15649.

- [S22] Q. Wang, F. Jia, S. Song, Y. Li, *Sep. Purif. Technol.*, 2020, **236**, 116298.
- [S23] W. Peng, W. Wang, G. Han, Y. Huang, Y. Zhang, *Desalination* 2020, **473**, 114191.
- [S24] S. Tian, X. Zhang, Z. Zhang, *Desalination* 2020, **479**, 114348.
- [S25] S. Tian, X. Zhang, Z. Zhang, *Chem. Eng. J.*, 2021, **409**, 128200.
- [S26] F. Xing, T. Li, J. Li, H. Zhu, N. Wang, X. Cao, *Nano Energy* 2017, **31**, 590-595.
- [S27] Y. Zhang, J. Wu, S. Zhang, N. Shang, X. Zhao, S.M. Alshehri, T. Ahamad, Y. Yamauchi, X. Xu, Y. Bando, *Nano Energy* 2022, **97**, 107146.
- [S28] J. Guo, X. Xu, J.P. Hill, L. Wang, J. Dang, Y. Kang, Y. Li, W. Guan, Y. Yamauchi, *Chem. Sci.*, 2021, **12**, 10334-10340.
- [S29] X. Gong, W. Luo, N. Guo, S. Zhang, L. Wang, D. Jia, L. Ai, S. Feng, *J. Mater. Chem. A* 2021, **9**, 18604-18613.
- [S30] Z. Wang, T. Yan, L. Shi, D. Zhang, *ACS Appl. Mater. Interfaces* 2017, **9**, 15068-15078.
- [S31] N.-L. Liu, S. Dutta, R.R. Salunkhe, T. Ahamad, S.M. Alshehri, Y. Yamauchi, C.-H. Hou, K.C.W. Wu, *Sci. Rep.*, 2016, **6**, 28847.
- [S32] H. Zhang, C. Wang, W. Zhang, M. Zhang, J. Qi, J. Qian, X. Sun, B. Yulianto, J. Na, T. Park, H.G.A. Gooma, Y.V. Kaneti, J.W. Yi, Y. Yamauchi, J. Li, *J. Mater. Chem. A* 2021, **9**, 12807-12817.
- [S33] Y. Li, Y. Liu, M. Wang, X. Xu, T. Lu, C.Q. Sun, L. Pan, *Carbon* 2018, **130**, 377-383.
- [S34] J. Qiu, Z. Yang, Q. Li, Y. Li, X. Wu, C. Qi, Q. Qiao, *J. Mater. Chem. A* 2016, **4**, 13296-13306.
- [S35] M. Yuan, H. Lv, H. Cheng, B. Zhao, G. Chen, J. Zhang, R. Che, *Adv. Funct. Mater.*, 2023, **33**, 2302003.
